# Supplementary material
Source: PubMed Central journal article supplement (PMC7334473)
Supplement: pnas.2002250117.sapp.pdf [file pnas.2002250117.sapp.pdf]

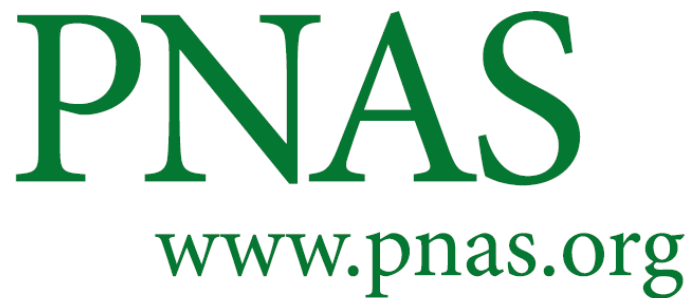

Supplementary Information for

**Mitochondrial protein interaction landscape of SS-31**

Juan D. Chavez<sup>a</sup>, Xiaoting Tang<sup>a</sup>, Matthew D. Campbell<sup>b</sup>, Gustavo Reyes<sup>b</sup>, Philip A. Kramer<sup>b</sup>, Rudy Stuppard<sup>b</sup>, Andrew Keller<sup>a</sup>, Huiliang Zhang<sup>c</sup>, Peter S. Rabinovitch<sup>c</sup>, David J. Marcinek<sup>b</sup>, and James E. Bruce<sup>a\*</sup>

\*To whom correspondence should be addressed. Email: jimbruce@uw.edu

**This PDF file includes:**

Supplementary text  
Figures S1 to S3  
Legend for Video S1  
Legends for Dataset S1  
SI References

**Other supplementary materials for this manuscript include the following:**

Video S1  
Dataset S1

## **Supplementary Information Text**

### **SI Material and Methods**

#### **Cross-linker synthesis**

The protein interaction reporter (PIR) cross-linker amide-DP-NHP was synthesized by solid phase peptide synthesis using a CEM Liberty Lite peptide synthesizer. Amino acids were coupled to amide-Rink resin in the following order: Fmoc-Lys(Fmoc), Fmoc-Pro, Fmoc-Asp, succinic anhydride. The N-hydroxyphthalamide (NHP) ester of trifluoroacetic acid (TFA) was synthesized by dissolving 5.86 g of NHP in 20 mL of TFA anhydride in a 50 mL round bottom flask. The reaction was allowed to proceed for 1.5 h under a dry N<sub>2</sub> atmosphere with constant mixing via magnetic stir bar. After 1.5 h the mixture was dried under vacuum to obtain a white crystalline solid (TFA-NHP). The cross-linker (0.5 mmoles of peptide on resin) was esterified by reacting with a 12-fold molar excess of TFA-NHP in 10 mL of dry pyridine for 20 min at room temperature with constant mixing. The reaction mixture was transferred to a Bio-Rad poly prep column and the liquid was filtered away. The resin containing the esterified peptide was washed extensively with a total of 60 mL dimethyl formamide (DMF) followed by 60 mL of dichloromethane (DCM). The cross-linker was cleaved from the resin by incubation with 5 mL of 95% TFA, 5% DCM for 3 h at room temperature with constant mixing. The cross-linker was precipitated by adding the cleavage solution to ice cold diethyl ether at a ratio of 1:15 by volume. The cross-linker was pelleted by centrifugation at 3400 g for 30 min at 4°C. The cross-linker pellet was washed by resuspending the pellet in 10 mL of fresh ice cold diethyl ether and repeating the centrifugation step. The cross-linker pellet was then dried by vacuum centrifugation and weighed. The cross-linker was dissolved in DMSO to a concentration of 270 mM, aliquoted and stored at -80°C until used.

#### **Cross-linked mitochondrial sample preparation**

Cross-linked mitochondrial samples were lysed with 8 M urea in 0.1 M NH<sub>4</sub>HCO<sub>3</sub>. The sample was kept on ice and sonicated with a GE 130 ultrasonic processor using 5 cycles of 5 s pulses at an amplitude of 40. The total protein concentration was measured using the Pierce Coomassie Plus Bradford protein assay. Protein disulfide bonds were reduced with 5 mM TCEP for 30 min followed by alkylation of thiol groups with 10 mM iodoacetamide for 30 min. Samples were diluted 10-fold with 0.1 M NH<sub>4</sub>HCO<sub>3</sub> and digested with a 1:200 ratio of trypsin to protein at 37°C overnight. After digestion samples were acidified by adding trifluoroacetic acid (TFA) to a final concentration of 1%. Acidified samples were desalted using Waters C18 Sep Pak cartridges and associated vacuum manifold. Samples were passed through the cartridge at a flow rate of 1 mL/min, followed by 3 mL washes of water containing 0.1% TFA. Peptides were eluted from the Sep Pak cartridge with 1 mL of 80% acetonitrile, 20% water, 0.1% TFA. Desalted samples were concentrated by vacuum centrifugation using a Genevac EZ-2 system. Dried samples were reconstituted in 0.5 mL of 0.1 M NH<sub>4</sub>HCO<sub>3</sub> and adjusted to pH 8 with 1.5 M NaOH. 100 µL of 50% UltraLink monomeric avidin slurry was added to the sample and incubated with constant mixing for 30 min at room temperature. The monomeric avidin resin was washed 5 times with 3 mL of 0.1 M NH<sub>4</sub>HCO<sub>3</sub> followed by elution of bound peptides with 2 additions of 0.5 mL of 70% acetonitrile, 0.5% formic acid, each with 5 min incubation. The eluate fractions were pooled and concentrated by vacuum centrifugation. The biotin enriched sample was reconstituted in 30 µL of 0.1% formic acid in water and subjected to LC-MS analysis as described below.

#### **LC-MS analysis of cross-linked peptide pairs**

Samples were analyzed by LC-MS using two methods developed for analysis of cross-linked peptide pairs, namely ReACT [1] and Mango [2]. ReACT analysis was carried out on a Velos-FTICR mass spectrometer coupled with a Waters nanoAcquity UPLC. Peptides were fractionated by reversed-phase liquid chromatography by first loading the sample (5 µL injection) onto a trapping column (3 cm x 100 µm i.d.) packed with Reprosil C8 beads (Dr. Maisch) using a flow rate of 2 µL/min of 98% solvent A (water, 0.1% formic acid) and 2% solvent B (acetonitrile, 0.1% formic acid). After trapping peptides were separated over an analytical column (60 cm x 75 µm) maintained at 45°C, packed with Reprosil C8 stationary phase using a flow rate of 300 nL/min and applying a binary gradient of 90% solvent A / 2% solvent B to 60% solvent A / 40% solvent B over 120 min followed by a wash cycle consisting of 20% solvent A / 80% solvent B for 20 min and a re-

equilibration period consisting of 98% solvent A / 2% solvent B for 20 min. Eluting peptides were ionized by electrospray ionization (ESI) by applying a voltage of 2.6 kV to a laser pulled spray tip at the end of the chromatography column. MS1 analysis (500-2000 m/z) was performed in the ICR cell with a resolving power setting of 50K at 400 m/z, and an automatic gain control (AGC) setting of 5E5. The most abundant precursor ion with a charge state  $\geq 4$  was selected for MS2 using an isolation window of 3 m/z and a normalized collision energy (NCE) of 25. Fragment ions were analyzed in the ICR cell using a resolving power setting of 12.5K at 400 m/z and an AGC setting of 2E5. MS2 spectra were searched in real-time for fragment ions that satisfy the expected PIR mass relationship (mass peptide 1 + mass peptide 2 + mass reporter = mass precursor) within a 20 ppm mass error tolerance. If satisfied the two released peptide ions were sequentially analyzed by MS3 in the Velos dual ion trap mass analyzer where they were isolated with a 3.0 m/z isolation window and fragmented with a NCE of 35 using an AGC setting of 5E4.

Samples were analyzed by Mango using a Thermo Q-exactive plus mass spectrometer coupled with a Thermo Easy nLC. 5  $\mu$ L of sample was injected into the nLC system where it was loaded onto a trapping column (3 cm x 100  $\mu$ m i.d.) packed with Reprosil C8 beads (Dr. Maisch) using a flow rate of 2  $\mu$ L/min of solvent A. After trapping peptides were separated over an analytical column (60 cm x 75  $\mu$ m) maintained at 45°C, packed with Reprosil C8 stationary phase using a flow rate of 300 nL/min by applying the same binary gradient described for the ReACT analysis above. Eluting peptides were ionized by electrospray ionization (ESI) by applying a voltage of 2.6 kV to a laser pulled spray tip at the end of the chromatography column. MS1 analysis (400-2000 m/z) was performed in the orbitrap mass analyzer using a resolving power setting of 70K at 200 m/z and an ACG value of 1E6. This was followed by MS2 on the 5 most abundant precursor ions with charge states  $\geq 4$  using a 3 m/z isolation window, a resolving power setting of 70K at 200 m/z and an ACG value of 5E4.

### Data analysis

LC-MS data files in .RAW format were converted to .mzXML format using the ReADW tool in the Trans Proteomic Pipeline software suite [3]. Comet [4] was used to search the .mzXML files against the Mitocarta 2 database [5] containing both forward and reverse protein sequences (2084 total sequences) along with the addition of the sequence for bSS-31 (Biotin-D-Arg-dimethyl Tyr-Lys-Phe-NH<sub>2</sub>). Due to the presence of non-canonical amino acids the bSS-31 sequence was entered using the following single letter amino acid sequence BJKZ. Within the Comet parameters file the mass of B (Biotin-D-Arg) was set to 382.17926 Da, the mass of J (dimethyl Tyr) was set to 191.094629 Da and the mass of Z (amidated Phe) was set to 146.084399 Da. Additional Comet parameters used for searching ReACT data included; a peptide mass tolerance of 20 ppm, allowance of -1/0/1/2/3 <sup>13</sup>C offsets, trypsin as the digesting enzyme considering only fully tryptic sequences with up to 5 missed cleavage sites. Oxidation of Met (15.9949 Da) was included as a variable modification while the cross-linker stump mass modification on Lys (197.032422 Da) was included as a required modification at any position within the peptide sequence except for the C-terminus, MS3 spectra were searched using a 1.0005 Da tolerance on the fragment ions with a bin offset of 0.4. Comet parameters used for Mango data were the same except that the Mango search parameter was set to 1, MS2 spectra were searched and a 0.02 Da tolerance with a 0.0 bin offset were used for fragment ions.

### Validation of bSS-31 fragmentation spectrum

Ten  $\mu$ L of 10.6 mM bSS-31 in 18.2 MΩ H<sub>2</sub>O was transferred to a 1.5 mL tube. 90  $\mu$ L of 170 mM Na<sub>2</sub>HPO<sub>4</sub> pH 8.0 was added. This was followed by addition of 1.11  $\mu$ L of 270 mM DP-amide cross-linker stock solution in DMSO resulting in a 3 mM final cross-linker concentration. The reaction was carried out at room temperature for 1 h with shaking 1400 rpm. The sample was then acidified to 1 % TFA by volume. The sample was then desalted using a 50 mg size C18 Sep-Pak column. After loading the sample onto the Sep-Pak the peptides were washed with 3 additions of 1 mL H<sub>2</sub>O/0.1% TFA. The sample was then eluted from the Sep-Pak column with 1 mL 50% ACN/ 2% CH<sub>3</sub>COOH and analyzed by direct infusion MS with the Velos-FTICR mass spectrometer. SpectraST v 5.0 was used to search fragmentation spectra generated by ReACT against a spectral library of the cross-linker modified bSS31. Fragmentation spectra assigned as bSS-31 cross-links were required

to contain the accurate mass of the DP stump modified bSS-31 (Fig. S1C) and have a SpectraST assigned p-value of less than 0.1.

### **Ex Vivo Mitochondrial Respiration and H<sub>2</sub>O<sub>2</sub> Production**

In a parallel experiment, mitochondria were isolated from young (5-7 month-old) and old (36-37 month old) mouse hearts or gastrocnemius muscles as described above either in the presence or absence of 10  $\mu$ M bSS-31. Approximately 100  $\mu$ g mitochondrial homogenate was used in the 2 mL chamber of an Oxygraph 2K dual respirometer/fluorometer (Oroboros Instruments, Innsbruck, Austria) at 37°C and stirred gently during substrate and inhibitor titrations. Heart mitochondrial respiration and H<sub>2</sub>O<sub>2</sub> production were measured simultaneously under the following conditions. State 4 was measured by adding 5 mM pyruvate, 2 mM malate, and 10 mM glutamate. State 3 was stimulated by adding 2.5 mM ADP (CI) followed by 10 mM succinate (CI+CII) then cytochrome C (6 mM). The rate of maximal uncoupled flux through the ETS was measured by adding 1  $\mu$ M FCCP. Following FCCP, Antimycin A (2.5  $\mu$ M) was added to block flux through complex III followed by TMPD and ascorbate (1mM and 4mM, respectively) to measure complex IV activity. The non-mitochondrial rate of oxygen consumption was subtracted from all measured functional parameters before reporting final values. In a separate experiment ADP sensitivity was measured in gastrocnemius muscles by measuring complex I stimulated respiration across a range of ADP concentrations. H<sub>2</sub>O<sub>2</sub> emission was measured in parallel with respiration using Amplex Red (10 mM) and HRP (0.1 U/mL).

### **In vivo ADP sensitivity assays**

In order to assess in vivo ADP sensitivity we reanalyzed data from Siegel et al. [6]. Briefly, a short ischemic period was used to induce PCr breakdown. This rate of PCr breakdown is equal to the resting mitochondrial ATP production. The PCr recovery was measured over 6 min to determine a time constant of recovery ( $t_{PCr}$ ) to yield  $ATP_{max}(= PCr_{rest}/ t_{PCr})$ . Free ADP concentration at rest and the start of recovery and ATP production at the start of recovery ( $ATP_{flux}= \Delta PCr/ t_{PCr}$ ) used to determine ADP sensitivity by fitting the [ADP] and ATPase rates at rest and initial recovery to Michaelis-Menton plots with a hill coefficient of 2.6 (**Fig. S3**)[6, 7].

### **In vivo superoxide production assay**

Single ventricular myocytes were enzymatically isolated from mouse hearts as described previously[8, 9]. SS-31 (1  $\mu$ M) or Biotin-SS31 (1  $\mu$ M) were added to the cultured cardiomyocytes for 12hrs. The mitochondrial superoxide was quantified by the ratio of mitoSOX to mitoTrackerGreen using Leica SP8X confocal microscopy. MitoSOX Red (5  $\mu$ M, excited at 540 nm with emission collected at > 560 nm) to mitoTrackerGreen (200 nM, excited at 488 nm and emission collected at 505-530 nm)[10].

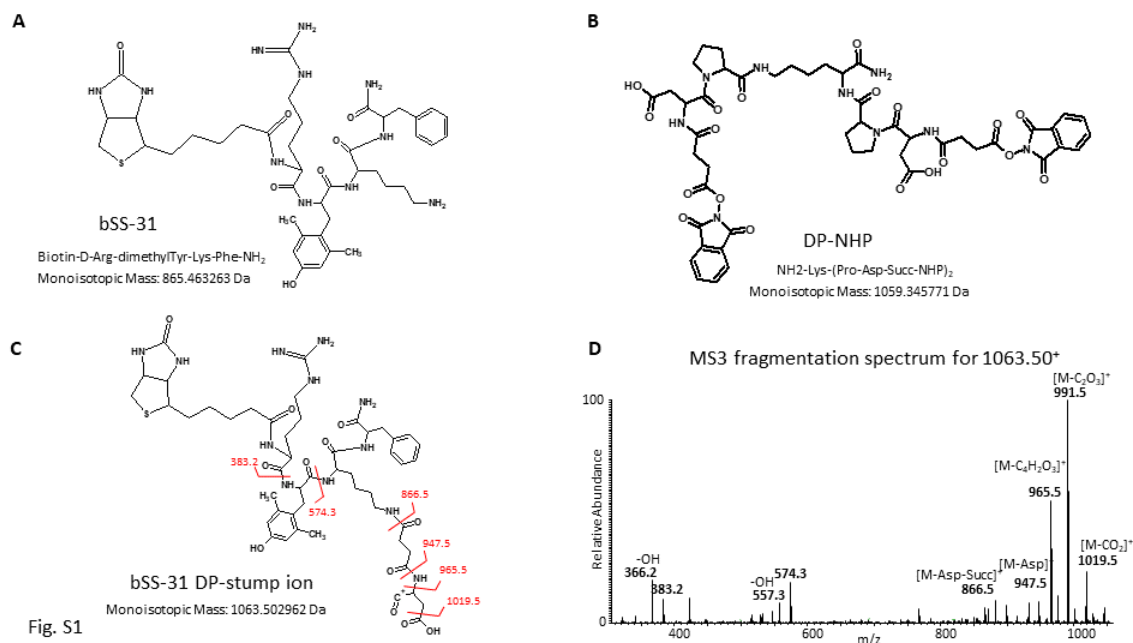

**Fig. S1.** Structures of biotin SS-31 and PIR cross-linker DP-NHP. A) chemical structure of biotinylated SS-31. B) chemical structure of DP-NHP cross-linker. C) chemical structure for bSS-31 DP-stump ion which results from MS2 fragmentation of the PIR labile bonds of DP cross-linked bSS-31. Red lines with numbers indicate the bonds which break to give rise to the major fragment ions observed in panel D. D) MS3 fragmentation pattern for bSS-31 DP stump ion with major fragment ions labeled. Bonds which fragment to give rise to these fragment ions are indicated in red in panel C. Ions at  $m/z$  557.3 and  $m/z$  366.2 result from loss of hydroxyl radical from fragments ions at  $m/z$  574.3 and  $m/z$  383.2 respectively.

A

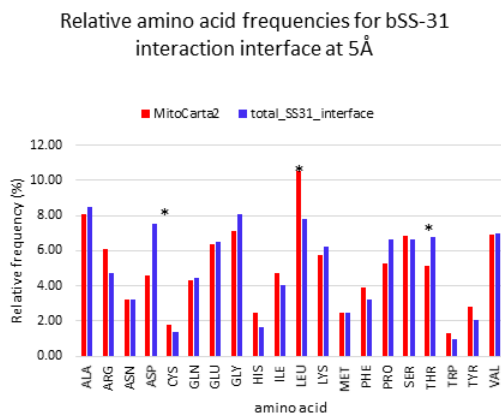

B

COMPOSITION  
PROFILER

|     |                  |                              |
|-----|------------------|------------------------------|
| Ala | Not significant. | P-value=0.625319 (>0.050000) |
| Arg | Not significant. | P-value=0.130040 (>0.050000) |
| Asn | Not significant. | P-value=0.967645 (>0.050000) |
| Asp | ↑ Enriched.      | P-value=0.000151 (≤0.050000) |
| Cys | Not significant. | P-value=0.452208 (>0.050000) |
| Gln | Not significant. | P-value=0.852845 (>0.050000) |
| Glu | Not significant. | P-value=0.837160 (>0.050000) |
| Gly | Not significant. | P-value=0.299125 (>0.050000) |
| His | Not significant. | P-value=0.158045 (>0.050000) |
| Ile | Not significant. | P-value=0.396237 (>0.050000) |
| Leu | ↓ Depleted.      | P-value=0.018157 (≤0.050000) |
| Lys | Not significant. | P-value=0.514830 (>0.050000) |
| Met | Not significant. | P-value=0.947528 (>0.050000) |
| Phe | Not significant. | P-value=0.351050 (>0.050000) |
| Pro | Not significant. | P-value=0.091603 (>0.050000) |
| Ser | Not significant. | P-value=0.866523 (>0.050000) |
| Thr | ↑ Enriched.      | P-value=0.040943 (≤0.050000) |
| Trp | Not significant. | P-value=0.411683 (>0.050000) |
| Tyr | Not significant. | P-value=0.244195 (>0.050000) |
| Val | Not significant. | P-value=0.508747 (>0.050000) |

C

| cross-linked residue | protein     | biorep1 | biorep2 | biorep3 | biorep4 | control | # of Lys | probability |
|----------------------|-------------|---------|---------|---------|---------|---------|----------|-------------|
| 159                  | AATM_MOUSE  |         |         |         |         |         | 30       | 3.7037E-05  |
| 272                  | ADT1_MOUSE  |         |         |         |         |         | 23       | 0.003952569 |
| 33                   | ADT1_MOUSE  |         |         |         |         |         | 23       | 7.47178E-06 |
| 506                  | ATPA_MOUSE  |         |         |         |         |         | 31       | 0.001040583 |
| 506                  | ATPA_MOUSE  |         |         |         |         |         | 31       | 1.08281E-06 |
| 480                  | ATPB_MOUSE  |         |         |         |         |         | 23       | 0.001890359 |
| 644                  | ECHA_MOUSE  |         |         |         |         |         | 66       | 1.01325E-10 |
| 505                  | ECHA_MOUSE  |         |         |         |         |         | 66       | 1.53523E-12 |
| 360                  | IDHP_MOUSE  |         |         |         |         |         | 37       | 2.13175E-12 |
| 272                  | IDHP_MOUSE  |         |         |         |         |         | 37       | 5.7615E-14  |
| 180                  | IDHP_MOUSE  |         |         |         |         |         | 37       | 2.13175E-12 |
| 230                  | KCR5_MOUSE  |         |         |         |         |         | 28       | 4.55539E-05 |
| 74                   | NDUA4_MOUSE |         |         |         |         |         | 8        | 0.000244141 |
| 582                  | ODO1_MOUSE  |         |         |         |         |         | 51       | 7.53858E-06 |
| 278                  | ODO2_MOUSE  |         |         |         |         |         | 26       | 0.038461538 |
| 199                  | QCR2_MOUSE  |         |         |         |         |         | 27       | 5.08053E-05 |
| 83                   | QCR6_MOUSE  |         |         |         |         |         | 7        | 0.002915452 |

D

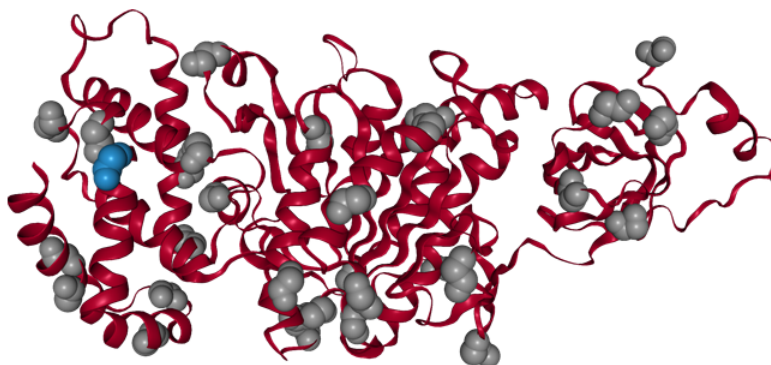

Fig. S2 (cont.)

**Fig. S2.** Amino acid composition of bSS-31 interaction interfaces – **A)** Bar plot indicating relative frequencies for the 20 amino acids in the MitoCarta2 database (red) and the amino acids comprising the bSS-31 interaction interface (residues within 5 angstroms of bSS-31 in docked models). Asterisks indicate a statistically significant difference ( $p < 0.05$ ) as calculated by the Composition Profiler tool. **B)** Output from Composition Profile comparing amino acid composition of the bSS-31 interaction interfaces to the MitoCarta2 database. **C)** Table of Lys residues cross-linked to bSS-31 indicating the number of biological replicates each was identified in (blue fill), as well as the probability that each residue would be linked to bSS-31 by random chance. **D)** Ribbon structure of ATPA indicating all Lys (31 total) as space filled residues. Grey residues were not found cross-linked to bSS-31 while K506 (blue) was the only residue cross-linked with bSS-31.

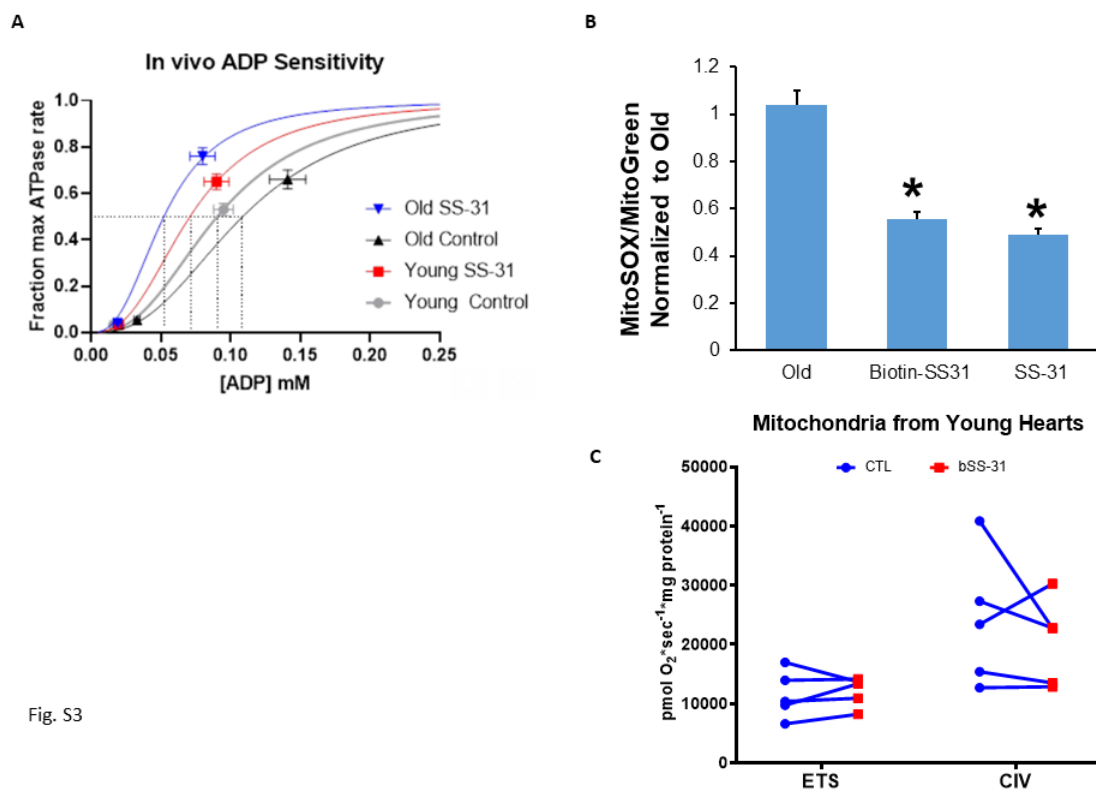

Fig. S3

**Fig. S3.** Effect of SS-31 on ADP sensitivity and superoxide production in vivo. **A)** Free ADP concentration at rest and the start of recovery and ATP production at the start of recovery (ATPflux= $\Delta$ PCr/ tPCr) used to determine ADP sensitivity by fitting the [ADP] and ATPase rates at rest and initial recovery to Michaelis-Menton plots with a hill coefficient of 2.6. **B)** Superoxide production by mitochondria from old cardiomyocytes treated with 1  $\mu$ M bSS-31, SS-31 or vehicle control for 12h. Superoxide production is indicated the normalized relative fluorescence intensity of MitoSOX to MitoGreen was measured on cells (N=26-75 cells per group). \* indicates statistical significance ( $p < 0.01$ ). **C)** Maximum uncoupled respiration (ETS) in mitochondria isolated from young mouse hearts in the presence of bSS-31 (red) or vehicle control (blue) and complex IV activity (CIV) in the presence of bSS-31 (red) or vehicle control (blue).

**Dataset S1 (separate file).** List of identified bSS-31 cross-linked peptides

**Video S1 (separate file).** Cross-link directed docked models for bSS-31 ADT1 interaction in the c-state (PDB: 2c3e) and m-state (PDB: 6gci). ADT is shown as red ribbon structures with the cross-linked residues K33 and K272 displayed as yellow space filled residues. Electrostatic interactions between D232-K33 and E265-K272 stabilize the c-state of ADT and are not present in the m-state.

## SI References

1. Weisbrod, C.R., et al., *In vivo protein interaction network identified with a novel real-time cross-linked peptide identification strategy*. J Proteome Res, 2013. **12**(4): p. 1569-79.
2. Mohr, J.P., et al., *Mango: A General Tool for Collision Induced Dissociation-Cleavable Cross-Linked Peptide Identification*. Anal Chem, 2018. **90**(10): p. 6028-6034.
3. Keller, A., et al., *A uniform proteomics MS/MS analysis platform utilizing open XML file formats*. Mol Syst Biol, 2005. **1**: p. 2005 0017.
4. Eng, J.K., T.A. Jahan, and M.R. Hoopmann, *Comet: an open-source MS/MS sequence database search tool*. Proteomics, 2013. **13**(1): p. 22-4.
5. Calvo, S.E., K.R. Clauser, and V.K. Mootha, *MitoCarta2.0: an updated inventory of mammalian mitochondrial proteins*. Nucleic Acids Res, 2016. **44**(D1): p. D1251-7.
6. Siegel, M.P., et al., *Mitochondrial-targeted peptide rapidly improves mitochondrial energetics and skeletal muscle performance in aged mice*. Aging Cell, 2013. **12**(5): p. 763-71.
7. Layec, G., et al., *Accuracy and precision of quantitative  $^{31}\text{P}$ -MRS measurements of human skeletal muscle mitochondrial function*. Am J Physiol Endocrinol Metab, 2016. **311**(2): p. E358-66.
8. Zhang, H., et al., *Beta-adrenergic-stimulated L-type channel  $\text{Ca}(2)^+$  entry mediates hypoxic  $\text{Ca}(2)^+$  overload in intact heart*. J Mol Cell Cardiol, 2013. **65**: p. 51-8.
9. Zhang, H., et al., *A novel fission-independent role of dynamin-related protein 1 in cardiac mitochondrial respiration*. Cardiovasc Res, 2017. **113**(2): p. 160-170.
10. Zhang H, et al., *Reduction of elevated proton leak rejuvenates mitochondria in the aged cardiomyocyte*. BioRxiv, 2020. <https://doi.org/10.1101/2020.01.02.893362>
